# Supplementary material for: The COVID-19 PHARMACOME: A method for the rational selection of drug repurposing candidates from multimodal knowledge harmonization
Source: bioRxiv or medRxiv preprint supplement (doi:10.1101/2020.09.23.308239), 2021-02-12

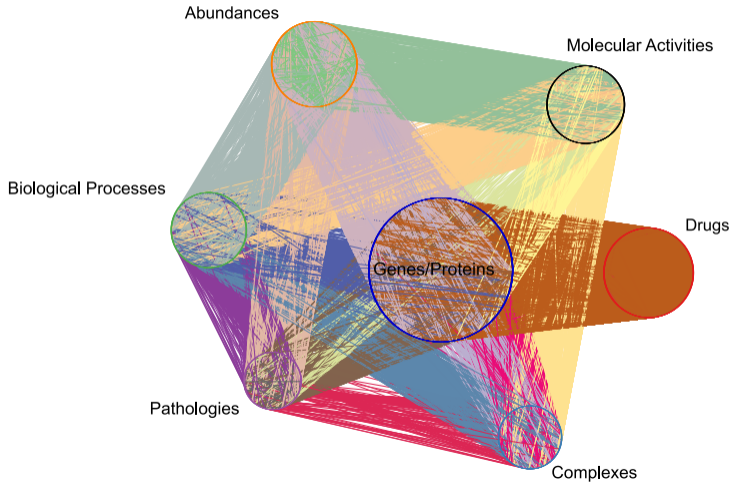

Supplement: Supplementary file [file media-2.pdf]
