# Supplementary material for: The COVID-19 PHARMACOME: A method for the rational selection of drug repurposing candidates from multimodal knowledge harmonization
Source: bioRxiv or medRxiv preprint supplement (doi:10.1101/2020.09.23.308239), 2021-02-12
Supplement: Supplementary file [file media-3.pdf]

a

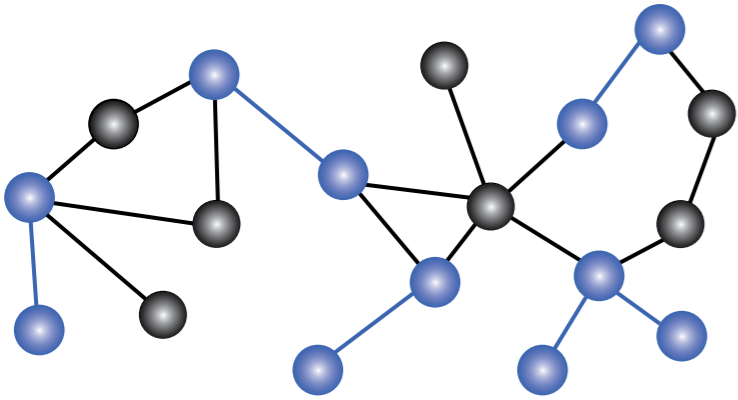

b

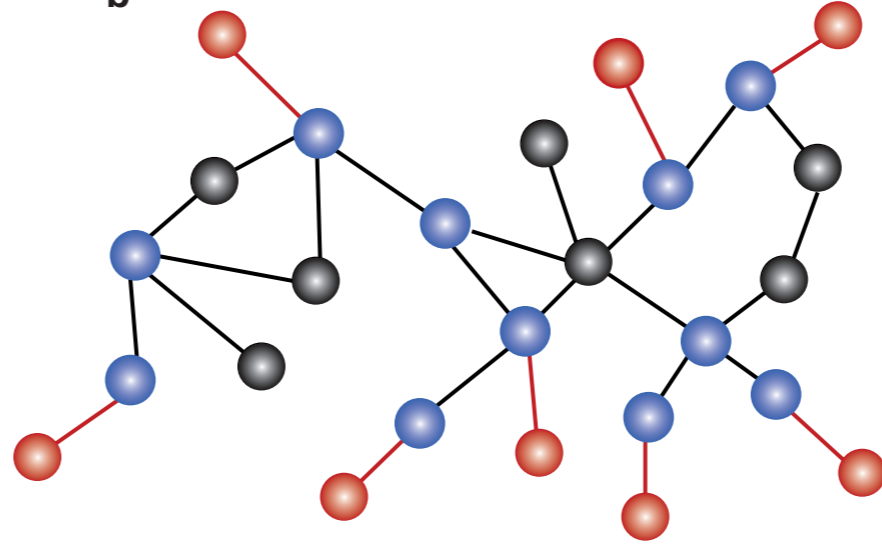

c

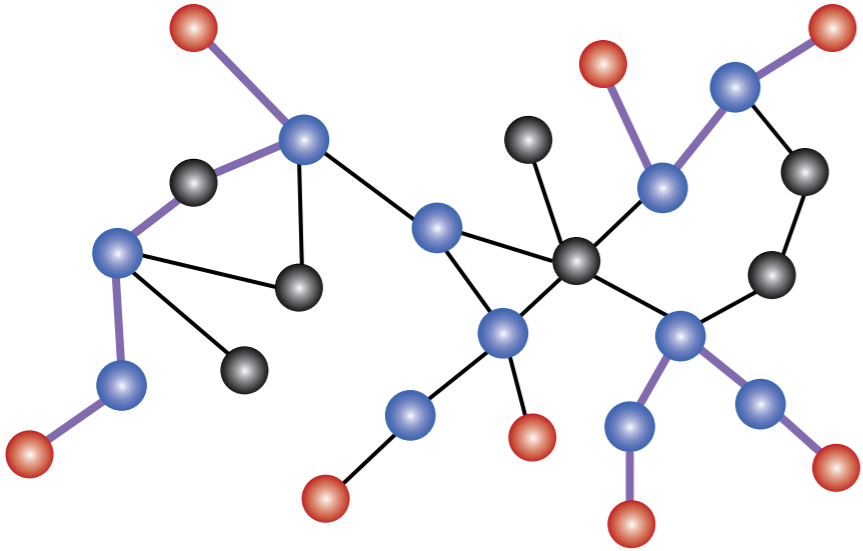

d

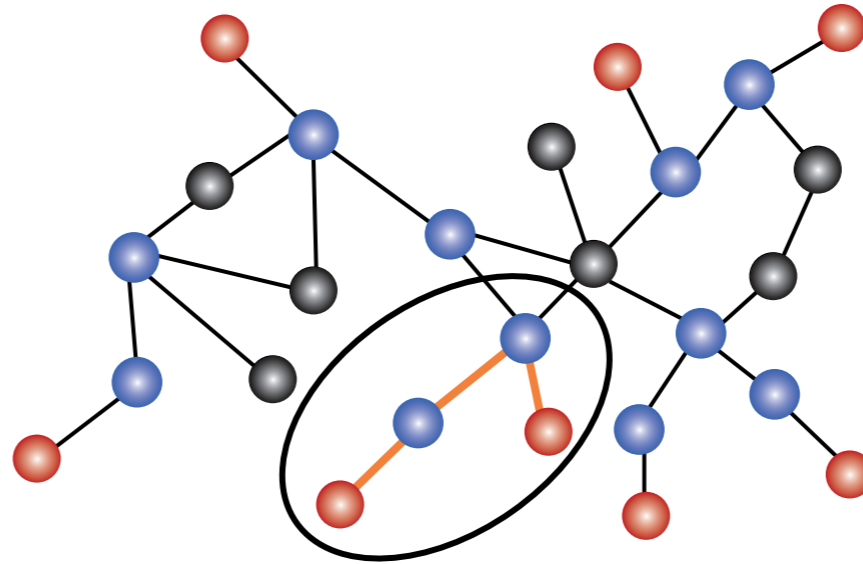

-  Node
-  HV Component
-  Drug
-  Mechanistic Interaction
-  Drug/ Target Interaction
-  Shortest Path Component for Known Drug Combination
-  Shortest Path Component for Predicted Drug Combination
